# Supplementary material for: Research on the relationship and prediction model between nighttime lighting data, pm2.5 data, and urban GDP
Source: PeerJ Comput Sci. 2025 Sep 16;11:e3185. doi: 10.7717/peerj-cs.3185 (PMC12453825; doi:10.7717/peerj-cs.3185)
Supplement: Supplemental Information 1 [file peerj-cs-11-3185-s001.xlsx]

## Sheet: Sheet1
	2007	GDP	Normalized GDP	PM2.5	Normalized PM2.5	Lighting Data	Normalized Lighting Data	0.1	0.2	0.3	0.4	0.5	0.6	0.7	0.8	0.9
	Anhui	7364.18	0.0566164	58.5377	0.666324	1.28823	0.084969	0.143105	0.20124	0.259376	0.317511	0.375647	0.433782	0.491918	0.550053	0.608189
	Beijing	9353.32	0.0726543	64.2679	0.736841	4.54667	0.309009	0.351792	0.394576	0.437359	0.480142	0.522925	0.565708	0.608491	0.651274	0.694057
	Fujian	9249.13	0.0718142	34.1551	0.36627	1.41568	0.0937319	0.120986	0.14824	0.175493	0.202747	0.230001	0.257255	0.284509	0.311762	0.339016
	Gansu	2702.4	0.0190297	36.038	0.389442	0.375268	0.0221963	0.0589209	0.0956455	0.13237	0.169095	0.205819	0.242544	0.279268	0.315993	0.352717
	Guangdong	31084.4	0.247866	41.4416	0.455938	2.1801	0.146291	0.177256	0.20822	0.239185	0.27015	0.301115	0.332079	0.363044	0.394009	0.424974
	Guangxi	5955.65	0.0452598	45.0794	0.500706	0.577874	0.0361269	0.0825848	0.129043	0.175501	0.221959	0.268416	0.314874	0.361332	0.40779	0.454248
	Guizhou	2741.9	0.0193482	39.4379	0.43128	0.599416	0.0376081	0.0769753	0.116343	0.15571	0.195077	0.234444	0.273811	0.313179	0.352546	0.391913
	Hainan	1223.28	0.00710399	25.6508	0.261616	1.04751	0.0684178	0.0877377	0.107058	0.126377	0.145697	0.165017	0.184337	0.203657	0.222977	0.242297
	Hebei	13709.5	0.107777	64.2397	0.736493	1.08703	0.0711349	0.137671	0.204207	0.270742	0.337278	0.403814	0.47035	0.536886	0.603422	0.669958
	Henan	15012.5	0.118282	73.3502	0.848607	1.25333	0.0825696	0.159173	0.235777	0.312381	0.388984	0.465588	0.542192	0.618796	0.695399	0.772003
	Heilongjiang	7065	0.0542042	23.6556	0.237064	0.463187	0.0282414	0.0491236	0.0700058	0.0908881	0.11177	0.132653	0.153535	0.174417	0.195299	0.216181
	Hubei	9230.68	0.0716655	53.2982	0.601846	0.749921	0.0479564	0.103345	0.158734	0.214123	0.269512	0.324901	0.38029	0.435679	0.491068	0.546457
	Hunan	9200	0.0714181	49.9347	0.560455	0.624883	0.0393591	0.0914687	0.143578	0.195688	0.247797	0.299907	0.352017	0.404126	0.456236	0.508345
	Jilin	5284.69	0.03985	37.876	0.41206	0.598512	0.037546	0.0749974	0.112449	0.1499	0.187352	0.224803	0.262254	0.299706	0.337157	0.374609
	Jiangsu	25741.2	0.204785	60.1852	0.686598	3.67785	0.249272	0.293005	0.336737	0.38047	0.424202	0.467935	0.511667	0.5554	0.599133	0.642865
	Jiangxi	5500.25	0.041588	43.0844	0.476155	0.584606	0.0365898	0.0805463	0.124503	0.168459	0.212416	0.256372	0.300329	0.344285	0.388242	0.432199
	Liaoning	11023.5	0.0861204	45.9644	0.511596	1.16544	0.0765262	0.120033	0.16354	0.207047	0.250554	0.294061	0.337568	0.381075	0.424582	0.468089
	Inner Mongolia	6091.12	0.0463521	27.5793	0.285348	0.329293	0.0190353	0.0456666	0.0722979	0.0989292	0.12556	0.152192	0.178823	0.205454	0.232086	0.258717
	Ningxia	889.2	0.00441039	42.2862	0.466332	0.939467	0.060989	0.101523	0.142057	0.182592	0.223126	0.26366	0.304195	0.344729	0.385263	0.425797
	Qinghai	783.61	0.00355905	13.8455	0.11634	0.290212	0.0163481	0.0263473	0.0363465	0.0463456	0.0563448	0.066344	0.0763432	0.0863423	0.0963415	0.106341
	Shandong	25965.9	0.206597	70.3845	0.812111	1.92305	0.128617	0.196967	0.265316	0.333666	0.402015	0.470364	0.538714	0.607063	0.675413	0.743762
	Shanxi	5733.35	0.0434675	53.6772	0.606511	0.89036	0.0576126	0.112502	0.167392	0.222282	0.277172	0.332062	0.386951	0.441841	0.496731	0.551621
	Shaanxi	5465.79	0.0413102	41.8559	0.461036	0.83519	0.0538192	0.0945409	0.135263	0.175984	0.216706	0.257428	0.298149	0.338871	0.379593	0.420315
	Shanghai	12188.9	0.0955164	53.4002	0.603102	13.9434	0.955102	0.919902	0.884702	0.849502	0.814302	0.779102	0.743902	0.708702	0.673502	0.638302
	Sichuan	10505.3	0.0819424	28.9637	0.302385	0.520738	0.0321985	0.0592172	0.0862358	0.113255	0.140273	0.167292	0.194311	0.221329	0.248348	0.275367
	Tianjin	5050.4	0.037961	81.9749	0.954743	6.59317	0.449721	0.500223	0.550725	0.601227	0.65173	0.702232	0.752734	0.803236	0.853739	0.904241
	Tibet	342.19	0	5.33233	0.0115759	0.270373	0.0149841	0.0146433	0.0143025	0.0139616	0.0136208	0.01328	0.0129392	0.0125984	0.0122576	0.0119168
	Xinjiang	3523.16	0.0256473	47.8529	0.534836	0.360974	0.0212135	0.0725758	0.123938	0.1753	0.226663	0.278025	0.329387	0.380749	0.432112	0.483474
	Yunnan	4741.31	0.0354689	30.3969	0.320022	0.466983	0.0285024	0.0576544	0.0868063	0.115958	0.14511	0.174262	0.203414	0.232566	0.261718	0.29087
	Zhejiang	18780.4	0.148663	44.2135	0.49005	2.69519	0.181707	0.212542	0.243376	0.27421	0.305044	0.335879	0.366713	0.397547	0.428381	0.459216
	Chongqing	4122.51	0.0304797	48.7196	0.545502	0.900377	0.0583013	0.107021	0.155741	0.204461	0.253182	0.301902	0.350622	0.399342	0.448062	0.496782
	Anhui	17212	0.136017	50.4718	0.567064	0.727382	0.0464066	0.0984724	0.150538	0.202604	0.25467	0.306736	0.358801	0.410867	0.462933	0.514999
	Beijing	17879.4	0.141398	59.3442	0.676249	1.79131	0.119559	0.175228	0.230897	0.286566	0.342235	0.397904	0.453573	0.509242	0.564911	0.62058
	Fujian	19701.8	0.156091	32.0114	0.33989	0.790025	0.0507138	0.0796315	0.108549	0.137467	0.166384	0.195302	0.22422	0.253137	0.282055	0.310973
	Gansu	5650.2	0.042797	33.376	0.356682	0.147767	0.00655404	0.0415669	0.0765797	0.111593	0.146605	0.181618	0.216631	0.251644	0.286657	0.32167
	Guangdong	57067.9	0.457364	37.7312	0.410278	1.10697	0.0725063	0.106283	0.140061	0.173838	0.207615	0.241392	0.275169	0.308946	0.342723	0.376501
	Guangxi	13035.1	0.102339	44.2308	0.490263	0.284363	0.015946	0.0633777	0.110809	0.158241	0.205673	0.253104	0.300536	0.347968	0.3954	0.442831
	Guizhou	6852.2	0.0524884	42.3388	0.466979	0.378473	0.0224167	0.066873	0.111329	0.155785	0.200242	0.244698	0.289154	0.33361	0.378067	0.422523
	Hainan	2855.54	0.0202645	20.081	0.193074	0.419606	0.0252449	0.0420279	0.0588108	0.0755937	0.0923767	0.10916	0.125943	0.142725	0.159508	0.176291
	Hebei	26575	0.211508	59.1944	0.674405	0.43098	0.026027	0.0908648	0.155703	0.22054	0.285378	0.350216	0.415054	0.479892	0.544729	0.609567
	Henan	29599.3	0.235892	69.147	0.796883	0.7386	0.047178	0.122148	0.197119	0.272089	0.34706	0.42203	0.497001	0.571971	0.646942	0.721912
	Heilongjiang	13691.6	0.107632	28.129	0.292113	0.0608911	0.000580741	0.0297339	0.0588871	0.0880403	0.117193	0.146347	0.1755	0.204653	0.233806	0.262959
	Hubei	22250.5	0.17664	54.6952	0.619037	0.430161	0.0259706	0.0852773	0.144584	0.203891	0.263197	0.322504	0.381811	0.441117	0.500424	0.559731
	Hunan	22154.2	0.175865	54.4426	0.615929	0.327878	0.018938	0.0786371	0.138336	0.198035	0.257735	0.317434	0.377133	0.436832	0.496531	0.55623
	Jilin	11939.2	0.0935039	38.0206	0.413839	0.106447	0.00371306	0.0447257	0.0857383	0.126751	0.167764	0.208776	0.249789	0.290801	0.331814	0.372827
	Jiangsu	54058.2	0.433098	54.1729	0.61261	2.52388	0.169928	0.214197	0.258465	0.302733	0.347001	0.391269	0.435538	0.479806	0.524074	0.568342
	Jiangxi	12948.9	0.101644	43.4397	0.480527	0.264384	0.0145723	0.0611678	0.107763	0.154359	0.200954	0.24755	0.294145	0.340741	0.387336	0.433932
	Liaoning	24846.4	0.197571	42.2231	0.465555	0.386598	0.0229753	0.0672333	0.111491	0.155749	0.200007	0.244265	0.288523	0.332781	0.377039	0.421297
	Inner Mongolia	15880.6	0.125282	25.7566	0.262918	0.0524448	0	0.0262918	0.0525836	0.0788754	0.105167	0.131459	0.157751	0.184043	0.210334	0.236626
	Ningxia	2341.29	0.0161182	40.4543	0.443789	0.341101	0.0198471	0.0622413	0.104636	0.14703	0.189424	0.231818	0.274212	0.316607	0.359001	0.401395
	Qinghai	1893.54	0.0125081	11.2964	0.0849697	0.111922	0.00408945	0.0121775	0.0202655	0.0283535	0.0364416	0.0445296	0.0526176	0.0607056	0.0687937	0.0768817
	Shandong	50013.2	0.400484	65.7935	0.755614	0.984087	0.0640569	0.133213	0.202368	0.271524	0.34068	0.409835	0.478991	0.548147	0.617302	0.686458
	Shanxi	12112.8	0.0949035	51.7284	0.582528	0.48623	0.0298257	0.085096	0.140366	0.195637	0.250907	0.306177	0.361447	0.416718	0.471988	0.527258
	Shaanxi	14453.7	0.113777	43.255	0.478255	0.489412	0.0300446	0.0748656	0.119687	0.164508	0.209329	0.25415	0.298971	0.343792	0.388613	0.433434
	Shanghai	20181.7	0.159961	46.975	0.524032	11.2399	0.769218	0.744699	0.720181	0.695662	0.671144	0.646625	0.622107	0.597588	0.573069	0.548551
	Sichuan	23872.8	0.189721	28.8948	0.301536	0.309112	0.0176477	0.0460365	0.0744254	0.102814	0.131203	0.159592	0.187981	0.21637	0.244759	0.273147
	Tianjin	12893.9	0.101201	73.5902	0.851561	2.65236	0.178762	0.246042	0.313322	0.380602	0.447882	0.515162	0.582442	0.649721	0.717001	0.784281
	Tibet	701.03	0.00289323	6.09845	0.0210038	0.133908	0.00560119	0.00714146	0.00868172	0.010222	0.0117622	0.0133025	0.0148428	0.016383	0.0179233	0.0194636
	Xinjiang	7505.31	0.0577543	45.7642	0.509133	0.0861747	0.00231917	0.0530005	0.103682	0.154363	0.205045	0.255726	0.306407	0.357089	0.40777	0.458451
	Yunnan	10309.5	0.0803635	28.8633	0.301149	0.257833	0.0141219	0.0428247	0.0715274	0.10023	0.128933	0.157636	0.186338	0.215041	0.243744	0.272447
	Zhejiang	34665.3	0.276738	39.4772	0.431765	1.62637	0.108219	0.140573	0.172928	0.205282	0.237637	0.269992	0.302346	0.334701	0.367055	0.39941
	Chongqing	11409.6	0.0892335	51.4061	0.578562	0.515183	0.0318165	0.086491	0.141166	0.19584	0.250515	0.305189	0.359864	0.414538	0.469213	0.523888
2012	Anhui	19038.9	0.150746	56.5877	0.642327	0.858088	0.0553936	0.114087	0.17278	0.231474	0.290167	0.34886	0.407553	0.466247	0.52494	0.583633
	Beijing	19500.6	0.154469	60.46	0.68998	2.57095	0.173165	0.224847	0.276528	0.32821	0.379891	0.431573	0.483254	0.534936	0.586617	0.638299
	Fujian	21759.6	0.172683	29.5186	0.309213	0.972815	0.0632819	0.087875	0.112468	0.137061	0.161654	0.186247	0.210841	0.235434	0.260027	0.28462
	Gansu	6268.01	0.0477783	38.0811	0.414583	0.186982	0.00925041	0.0497837	0.090317	0.13085	0.171384	0.211917	0.25245	0.292984	0.333517	0.37405
	Guangdong	62164	0.498452	36.0302	0.389346	1.62257	0.107957	0.136096	0.164235	0.192374	0.220513	0.248651	0.27679	0.304929	0.333068	0.361207
	Guangxi	14378	0.113167	42.5772	0.469913	0.348502	0.020356	0.0653117	0.110267	0.155223	0.200179	0.245135	0.29009	0.335046	0.380002	0.424957
	Guizhou	8006.79	0.0617976	38.9457	0.425223	0.391762	0.0233305	0.0635198	0.103709	0.143898	0.184088	0.224277	0.264466	0.304656	0.344845	0.385034
	Hainan	3146.46	0.0226101	23.1181	0.230449	0.649327	0.0410399	0.0599808	0.0789217	0.0978626	0.116804	0.135744	0.154685	0.173626	0.192567	0.211508
	Hebei	28301.4	0.225428	66.3848	0.76289	0.622063	0.0391652	0.111538	0.18391	0.256283	0.328655	0.401028	0.4734	0.545773	0.618145	0.690518
	Henan	32155.9	0.256505	73.8447	0.854693	0.796826	0.0511814	0.131533	0.211884	0.292235	0.372586	0.452937	0.533288	0.613639	0.693991	0.774342
	Heilongjiang	14382.9	0.113207	28.1278	0.292099	0.25256	0.0137593	0.0415933	0.0694272	0.0972611	0.125095	0.152929	0.180763	0.208597	0.236431	0.264265
	Hubei	24668.5	0.196136	57.781	0.657012	0.480205	0.0294115	0.0921716	0.154932	0.217692	0.280452	0.343212	0.405972	0.468732	0.531492	0.594252
	Hunan	24501.7	0.194791	50.2813	0.564721	0.375594	0.0222188	0.076469	0.130719	0.184969	0.23922	0.29347	0.34772	0.40197	0.45622	0.510471
	Jilin	12981.5	0.101907	39.7871	0.435578	0.364593	0.0214623	0.0628739	0.104285	0.145697	0.187108	0.22852	0.269931	0.311343	0.352755	0.394166
	Jiangsu	59161.8	0.474246	60.6765	0.692644	2.82879	0.190893	0.241068	0.291244	0.341419	0.391594	0.441769	0.491944	0.542119	0.592294	0.642469
	Jiangxi	14338.5	0.112848	40.8546	0.448715	0.335896	0.0194892	0.0624118	0.105334	0.148257	0.19118	0.234102	0.277025	0.319947	0.36287	0.405792
	Liaoning	27077.7	0.215561	42.1013	0.464057	0.752823	0.0481559	0.089746	0.131336	0.172926	0.214516	0.256106	0.297697	0.339287	0.380877	0.422467
	Inner Mongolia	16832.4	0.132956	26.3081	0.269705	0.160393	0.00742219	0.0336505	0.0598788	0.0861071	0.112335	0.138564	0.164792	0.19102	0.217249	0.243477
	Ningxia	2565.06	0.0179224	40.638	0.44605	0.533611	0.0330835	0.0743802	0.115677	0.156973	0.19827	0.239567	0.280863	0.32216	0.363456	0.404753
	Qinghai	2101.05	0.0141812	13.7362	0.114995	0.141577	0.00612849	0.0170151	0.0279017	0.0387883	0.049675	0.0605616	0.0714482	0.0823348	0.0932214	0.104108
	Shandong	54684.3	0.438146	68.8072	0.792701	1.12067	0.073448	0.145373	0.217299	0.289224	0.361149	0.433074	0.505	0.576925	0.64885	0.720776
	Shanxi	12602.2	0.0988494	50.1481	0.563081	0.539089	0.0334602	0.0864223	0.139384	0.192346	0.245308	0.29827	0.351233	0.404195	0.457157	0.510119
	Shaanxi	16045.2	0.126609	41.3948	0.455363	0.564058	0.035177	0.0771956	0.119214	0.161233	0.203251	0.24527	0.287289	0.329307	0.371326	0.413344
	Shanghai	21602.1	0.171413	50.7168	0.57008	12.367	0.846709	0.819046	0.791383	0.76372	0.736057	0.708394	0.680731	0.653068	0.625405	0.597742
	Sichuan	26260.8	0.208974	29.0151	0.303018	0.351168	0.0205393	0.0487871	0.077035	0.105283	0.133531	0.161778	0.190026	0.218274	0.246522	0.27477
	Tianjin	14370.2	0.113104	82.0656	0.95586	4.20627	0.285605	0.35263	0.419656	0.486681	0.553707	0.620732	0.687758	0.754783	0.821809	0.888834
	Tibet	807.67	0.00375304	5.20396	0.00999622	0.152683	0.00689209	0.0072025	0.00751291	0.00782333	0.00813374	0.00844415	0.00875457	0.00906498	0.00937539	0.00968581
	Xinjiang	8360.24	0.0646474	48.5747	0.543718	0.177212	0.00857864	0.0620926	0.115607	0.169121	0.222635	0.276149	0.329662	0.383176	0.43669	0.490204
	Yunnan	11720.9	0.0917435	28.8093	0.300485	0.288432	0.0162257	0.0446516	0.0730775	0.101503	0.129929	0.158355	0.186781	0.215207	0.243633	0.272059
	Zhejiang	37568.5	0.300146	41.4312	0.455811	1.87808	0.125525	0.158554	0.191582	0.224611	0.257639	0.290668	0.323696	0.356725	0.389754	0.422782
	Chongqing	12656.7	0.0992885	47.3442	0.528577	0.593583	0.037207	0.086344	0.135481	0.184618	0.233755	0.282892	0.332029	0.381166	0.430303	0.47944
2013	Anhui	20848.8	0.165339	56.3203	0.639036	0.815736	0.0524816	0.111137	0.169792	0.228448	0.287103	0.345759	0.404414	0.46307	0.521725	0.580381
	Beijing	21330.8	0.169226	68.7039	0.791429	3.96134	0.268764	0.32103	0.373297	0.425563	0.47783	0.530096	0.582363	0.634629	0.686896	0.739163
	Fujian	24055.8	0.191196	31.1506	0.329297	1.0094	0.0657976	0.0921476	0.118498	0.144847	0.171197	0.197547	0.223897	0.250247	0.276597	0.302947
	Gansu	6836.82	0.0523644	36.2024	0.391464	0.244733	0.0132212	0.0510455	0.0888698	0.126694	0.164518	0.202343	0.240167	0.277991	0.315816	0.35364
	Guangdong	67809.9	0.543973	36.9722	0.400938	1.68327	0.11213	0.141011	0.169892	0.198773	0.227654	0.256534	0.285415	0.314296	0.343177	0.372058
	Guangxi	15672.9	0.123607	42.9809	0.474881	0.348523	0.0203575	0.0658098	0.111262	0.156714	0.202167	0.247619	0.293071	0.338524	0.383976	0.429428
	Guizhou	9266.39	0.0719534	39.9243	0.437267	0.390537	0.0232462	0.0646483	0.10605	0.147452	0.188855	0.230257	0.271659	0.313061	0.354463	0.395865
	Hainan	3500.72	0.0254664	21.9366	0.215909	0.702436	0.0446915	0.0618133	0.078935	0.0960568	0.113179	0.1303	0.147422	0.164544	0.181666	0.198788
	Hebei	29421.2	0.234456	67.0138	0.770631	0.850327	0.05486	0.126437	0.198014	0.269591	0.341168	0.412746	0.484323	0.5559	0.627477	0.699054
	Henan	34938.2	0.278939	61.817	0.706679	0.872795	0.0564048	0.121432	0.18646	0.251487	0.316515	0.381542	0.44657	0.511597	0.576625	0.641652
	Heilongjiang	15039.4	0.118499	32.9032	0.350864	0.352317	0.0206183	0.0536429	0.0866675	0.119692	0.152717	0.185741	0.218766	0.25179	0.284815	0.31784
	Hubei	27379.2	0.217992	51.6658	0.581758	0.474667	0.0290307	0.0843034	0.139576	0.194849	0.250122	0.305394	0.360667	0.41594	0.471213	0.526485
	Hunan	27037.3	0.215236	51.671	0.581822	0.369544	0.0218028	0.0778048	0.133807	0.189809	0.245811	0.301813	0.357815	0.413817	0.469818	0.52582
	Jilin	13803.1	0.108532	42.8678	0.473489	0.405576	0.0242802	0.0692011	0.114122	0.159043	0.203964	0.248884	0.293805	0.338726	0.383647	0.428568
	Jiangsu	65088.3	0.52203	60.0125	0.684473	2.74407	0.185068	0.235008	0.284949	0.334889	0.38483	0.434771	0.484711	0.534652	0.584592	0.634533
	Jiangxi	15714.6	0.123944	42.4098	0.467853	0.318003	0.018259	0.0632184	0.108178	0.153137	0.198097	0.243056	0.288016	0.332975	0.377935	0.422894
	Liaoning	28626.6	0.228049	48.1386	0.538351	0.929671	0.0603154	0.108119	0.155923	0.203726	0.25153	0.299333	0.347137	0.394941	0.442744	0.490548
	Inner Mongolia	17770.2	0.140517	28.5738	0.297586	0.227801	0.012057	0.0406099	0.0691628	0.0977158	0.126269	0.154822	0.183375	0.211927	0.24048	0.269033
	Ningxia	2752.1	0.0194304	37.9654	0.413161	0.725959	0.0463088	0.082994	0.119679	0.156364	0.19305	0.229735	0.26642	0.303105	0.33979	0.376475
	Qinghai	2303.32	0.0158121	13.5965	0.113275	0.152969	0.00691173	0.0175481	0.0281845	0.0388209	0.0494572	0.0600936	0.07073	0.0813664	0.0920027	0.102639
	Shandong	12761.5	0.100133	62.2474	0.711976	1.37549	0.090969	0.15307	0.21517	0.277271	0.339372	0.401472	0.463573	0.525674	0.587774	0.649875
	Shanxi	59426.6	0.476381	46.1125	0.513419	0.728832	0.0465063	0.0931976	0.139889	0.18658	0.233271	0.279963	0.326654	0.373345	0.420037	0.466728
	Shaanxi	17689.9	0.13987	38.5245	0.420041	0.65488	0.0414217	0.0792836	0.117146	0.155007	0.192869	0.230731	0.268593	0.306455	0.344317	0.382179
	Shanghai	23567.7	0.187261	50.0422	0.561778	11.8743	0.812838	0.787732	0.762626	0.73752	0.712414	0.687308	0.662202	0.637096	0.61199	0.586884
	Sichuan	28536.7	0.227324	25.6811	0.261989	0.294753	0.0166604	0.0411932	0.0657261	0.0902589	0.114792	0.139325	0.163858	0.18839	0.212923	0.237456
	Tianjin	15726.9	0.124043	85.6525	1	5.52637	0.376371	0.438734	0.501097	0.56346	0.625823	0.688185	0.750548	0.812911	0.875274	0.937637
	Tibet	920.83	0.00466542	5.82035	0.0175816	0.133003	0.00553895	0.00674321	0.00794747	0.00915173	0.010356	0.0115603	0.0127645	0.0139688	0.015173	0.0163773
	Xinjiang	9273.46	0.0720104	48.0293	0.537008	0.272016	0.0150971	0.0672881	0.119479	0.17167	0.223861	0.276052	0.328243	0.380434	0.432625	0.484817
	Yunnan	12814.6	0.100562	29.256	0.305982	0.267805	0.0148075	0.043925	0.0730425	0.10216	0.131277	0.160395	0.189512	0.21863	0.247747	0.276865
	Zhejiang	40173	0.321145	44.2496	0.490494	1.86886	0.124891	0.161452	0.198012	0.234572	0.271132	0.307693	0.344253	0.380813	0.417374	0.453934
	Chongqing	14262.6	0.112236	45.0181	0.499951	0.550957	0.0342762	0.0808437	0.127411	0.173979	0.220546	0.267113	0.313681	0.360248	0.406816	0.453383
2014	Anhui	22005.6	0.174666	49.8525	0.559443	0.874957	0.0565534	0.106842	0.157131	0.20742	0.257709	0.307998	0.358287	0.408576	0.458865	0.509154
	Beijing	23014.6	0.182801	60.4841	0.690277	4.1192	0.279618	0.320684	0.361749	0.402815	0.443881	0.484947	0.526013	0.567079	0.608145	0.649211
	Fujian	25979.8	0.206709	26.9675	0.277819	1.05292	0.0687896	0.0896926	0.110596	0.131499	0.152402	0.173304	0.194207	0.21511	0.236013	0.256916
	Gansu	6790.32	0.0519895	34.4118	0.36943	0.232365	0.0123708	0.0480767	0.0837826	0.119488	0.155194	0.1909	0.226606	0.262312	0.298018	0.333724
	Guangdong	72812.6	0.584309	31.9557	0.339204	1.72413	0.11494	0.137366	0.159793	0.182219	0.204646	0.227072	0.249498	0.271925	0.294351	0.316778
	Guangxi	16803.1	0.13272	36.1701	0.391066	0.409772	0.0245687	0.0612185	0.0978683	0.134518	0.171168	0.207818	0.244467	0.281117	0.317767	0.354417
	Guizhou	10502.6	0.0819203	34.3018	0.368075	0.390217	0.0232242	0.0577093	0.0921944	0.12668	0.161165	0.19565	0.230135	0.26462	0.299105	0.33359
	Hainan	3702.76	0.0270954	19.3981	0.18467	0.786273	0.0504558	0.0638773	0.0772987	0.0907202	0.104142	0.117563	0.130985	0.144406	0.157827	0.171249
	Hebei	29806.1	0.23756	57.9271	0.65881	0.831419	0.0535599	0.114085	0.17461	0.235135	0.29566	0.356185	0.41671	0.477235	0.53776	0.598285
	Henan	37002.2	0.295579	63.4769	0.727106	0.873266	0.0564372	0.123504	0.190571	0.257638	0.324705	0.391772	0.458839	0.525906	0.592973	0.660039
	Heilongjiang	15083.7	0.118857	31.7919	0.337188	0.293408	0.0165679	0.04863	0.080692	0.112754	0.144816	0.176878	0.20894	0.241002	0.273064	0.305126
	Hubei	29550.2	0.235496	48.8505	0.547112	0.512625	0.0316406	0.0831877	0.134735	0.186282	0.237829	0.289376	0.340924	0.392471	0.444018	0.495565
	Hunan	28902.2	0.230272	44.2744	0.490799	0.395016	0.0235542	0.0702786	0.117003	0.163728	0.210452	0.257177	0.303901	0.350625	0.39735	0.444074
	Jilin	14063.1	0.110628	44.6903	0.495917	0.439845	0.0266365	0.0735645	0.120493	0.167421	0.214349	0.261277	0.308205	0.355133	0.402061	0.448989
	Jiangsu	70116.4	0.56257	55.4935	0.628862	2.88627	0.194845	0.238247	0.281649	0.32505	0.368452	0.411854	0.455255	0.498657	0.542059	0.58546
	Jiangxi	16723.8	0.13208	35.6282	0.384398	0.337266	0.0195835	0.0560649	0.0925464	0.129028	0.165509	0.201991	0.238472	0.274954	0.311435	0.347917
	Liaoning	28669	0.228392	46.6871	0.520489	0.950124	0.0617217	0.107598	0.153475	0.199352	0.245229	0.291105	0.336982	0.382859	0.428736	0.474612
	Inner Mongolia	17831.5	0.141012	29.5254	0.309297	0.180509	0.00880534	0.0388545	0.0689037	0.0989528	0.129002	0.159051	0.1891	0.219149	0.249199	0.279248
	Ningxia	2911.77	0.0207178	38.4194	0.418747	0.68715	0.0436404	0.0811511	0.118662	0.156172	0.193683	0.231194	0.268704	0.306215	0.343726	0.381236
	Qinghai	2417.05	0.016729	12.2953	0.0972621	0.168065	0.00794973	0.016881	0.0258122	0.0347434	0.0436747	0.0526059	0.0615372	0.0704684	0.0793996	0.0883309
	Shandong	12766.5	0.100174	69.3958	0.799944	1.3864	0.091719	0.162541	0.233364	0.304186	0.375009	0.445831	0.516654	0.587476	0.658299	0.729121
	Shanxi	63002.3	0.505212	43.3834	0.479834	0.684812	0.0434797	0.0871151	0.130751	0.174386	0.218022	0.261657	0.305293	0.348928	0.392563	0.436199
	Shaanxi	18021.9	0.142546	36.196	0.391386	0.609604	0.0383086	0.0736163	0.108924	0.144232	0.17954	0.214847	0.250155	0.285463	0.320771	0.356078
	Shanghai	25123.5	0.199805	49.8712	0.559674	12.7568	0.873513	0.842129	0.810745	0.779361	0.747977	0.716593	0.68521	0.653826	0.622442	0.591058
	Sichuan	30053.1	0.239551	23.9387	0.240546	0.295379	0.0167034	0.0390877	0.061472	0.0838563	0.106241	0.128625	0.151009	0.173393	0.195778	0.218162
	Tianjin	16538.2	0.130584	72.1057	0.833293	5.59929	0.381385	0.426575	0.471766	0.516957	0.562148	0.607339	0.652529	0.69772	0.742911	0.788102
	Tibet	1026.39	0.00551652	5.33462	0.0116042	0.162786	0.00758673	0.00798848	0.00839022	0.00879196	0.00919371	0.00959545	0.00999719	0.0103989	0.0108007	0.0112024
	Xinjiang	9324.8	0.0724243	44.9587	0.49922	0.236417	0.0126494	0.0613065	0.109964	0.158621	0.207278	0.255935	0.304592	0.353249	0.401906	0.450563
	Yunnan	13619.2	0.107049	26.1231	0.267428	0.294881	0.0166692	0.0417451	0.066821	0.0918969	0.116973	0.142049	0.167125	0.1922	0.217276	0.242352
	Zhejiang	42886.5	0.343023	38.6409	0.421472	1.98642	0.132975	0.161824	0.190674	0.219524	0.248374	0.277223	0.306073	0.334923	0.363773	0.392623
	Chongqing	15717.3	0.123965	41.1018	0.451757	0.538564	0.0334241	0.0752574	0.117091	0.158924	0.200757	0.24259	0.284424	0.326257	0.36809	0.409924
2015	Anhui	24407.6	0.194033	45.5441	0.506424	0.881131	0.056978	0.101923	0.146867	0.191812	0.236756	0.281701	0.326645	0.37159	0.416535	0.461479
	Beijing	25669.1	0.204204	54.5663	0.617452	4.39998	0.298923	0.330776	0.362629	0.394482	0.426335	0.458188	0.490041	0.521893	0.553746	0.585599
	Fujian	28810.6	0.229533	25.4879	0.259611	0.999165	0.0650937	0.0845454	0.103997	0.123449	0.142901	0.162352	0.181804	0.201256	0.220707	0.240159
	Gansu	7200.37	0.0552956	32.7166	0.348569	0.18249	0.00894153	0.0429042	0.0768669	0.11083	0.144792	0.178755	0.212718	0.24668	0.280643	0.314606
	Guangdong	18317.6	0.144931	29.4555	0.308437	1.63744	0.10898	0.128925	0.148871	0.168817	0.188763	0.208709	0.228654	0.2486	0.268546	0.288492
	Guangxi	80854.9	0.649152	32.3077	0.343536	0.343688	0.020025	0.0523761	0.0847271	0.117078	0.149429	0.18178	0.214131	0.246482	0.278834	0.311185
	Guizhou	11776.7	0.0921936	32.4748	0.345593	0.426477	0.0257174	0.0577049	0.0896924	0.12168	0.153667	0.185655	0.217643	0.24963	0.281618	0.313605
	Hainan	4053.2	0.0299209	19.6933	0.188303	0.716695	0.0456719	0.059935	0.0741981	0.0884612	0.102724	0.116987	0.131251	0.145514	0.159777	0.17404
	Hebei	32070.5	0.255816	53.75	0.607406	0.818669	0.0526833	0.108156	0.163628	0.2191	0.274572	0.330044	0.385517	0.440989	0.496461	0.551933
	Henan	40471.8	0.323554	56.8699	0.6458	0.87432	0.0565097	0.115439	0.174368	0.233297	0.292226	0.351155	0.410084	0.469013	0.527942	0.586871
	Heilongjiang	15386.1	0.121295	26.0606	0.266659	0.301931	0.0171539	0.0421045	0.067055	0.0920056	0.116956	0.141907	0.166857	0.191808	0.216758	0.241709
	Hubei	32665.4	0.260613	42.1898	0.465146	0.465589	0.0284066	0.0720805	0.115754	0.159428	0.203102	0.246776	0.29045	0.334124	0.377798	0.421472
	Hunan	31551.4	0.251631	39.6019	0.433299	0.378202	0.0223981	0.0634882	0.104578	0.145668	0.186758	0.227848	0.268938	0.310029	0.351119	0.392209
	Jilin	14776.8	0.116382	33.8635	0.362681	0.388334	0.0230947	0.0570534	0.0910121	0.124971	0.158929	0.192888	0.226847	0.260805	0.294764	0.328723
	Jiangsu	77388.3	0.621202	49.5237	0.555397	2.9414	0.198636	0.234312	0.269988	0.305664	0.34134	0.377016	0.412692	0.448368	0.484045	0.519721
	Jiangxi	18499	0.146393	34.4864	0.370348	0.309666	0.0176857	0.0529519	0.0882182	0.123484	0.158751	0.194017	0.229283	0.264549	0.299815	0.335082
	Liaoning	22246.9	0.176612	38.8933	0.424578	0.898735	0.0581884	0.0948274	0.131466	0.168105	0.204744	0.241383	0.278022	0.314661	0.3513	0.387939
	Inner Mongolia	18128.1	0.143403	25.8808	0.264446	0.161485	0.00749727	0.0331922	0.058887	0.0845819	0.110277	0.135972	0.161667	0.187361	0.213056	0.238751
	Ningxia	3168.59	0.0227885	37.7185	0.410122	0.696329	0.0442716	0.0808566	0.117442	0.154027	0.190612	0.227197	0.263782	0.300367	0.336952	0.373537
	Qinghai	2572.49	0.0179823	11.9567	0.0930956	0.0979111	0.00312613	0.0121231	0.02112	0.030117	0.0391139	0.0481109	0.0571078	0.0661047	0.0751017	0.0840986
	Shandong	68024.5	0.545704	61.5844	0.703817	1.40326	0.0928779	0.153972	0.215066	0.27616	0.337253	0.398347	0.459441	0.520535	0.581629	0.642723
	Shanxi	13050.4	0.102463	43.3878	0.479888	0.620179	0.0390357	0.083121	0.127206	0.171292	0.215377	0.259462	0.303547	0.347633	0.391718	0.435803
	Shaanxi	19399.6	0.153655	35.625	0.384359	0.57628	0.0360173	0.0708515	0.105686	0.14052	0.175354	0.210188	0.245022	0.279856	0.31469	0.349525
	Shanghai	28178.7	0.224438	42.4948	0.468899	12.6473	0.865985	0.826276	0.786567	0.746859	0.70715	0.667442	0.627733	0.588025	0.548316	0.508608
	Sichuan	32934.5	0.262783	23.3068	0.232771	0.305944	0.0174298	0.0389639	0.0604981	0.0820322	0.103566	0.1251	0.146635	0.168169	0.189703	0.211237
	Tianjin	17885.4	0.141446	68.0573	0.783472	5.70046	0.388341	0.427854	0.467367	0.50688	0.546393	0.585906	0.62542	0.664933	0.704446	0.743959
	Tibet	1151.41	0.00652452	5.79114	0.0172222	0.0685404	0.00110668	0.00271823	0.00432978	0.00594132	0.00755287	0.00916442	0.010776	0.0123875	0.0139991	0.0156106
	Xinjiang	9649.7	0.0750439	47.5276	0.530834	0.177879	0.00862446	0.0608454	0.113066	0.165287	0.217508	0.269729	0.32195	0.374171	0.426392	0.478613
	Yunnan	14788.4	0.116476	24.8888	0.252239	0.232326	0.0123681	0.0363552	0.0603423	0.0843294	0.108317	0.132304	0.156291	0.180278	0.204265	0.228252
	Zhejiang	47251.4	0.378216	34.0274	0.364699	2.05815	0.137906	0.160586	0.183265	0.205944	0.228624	0.251303	0.273982	0.296661	0.319341	0.34202
	Chongqing	17740.6	0.140279	38.7551	0.422878	0.641001	0.0404674	0.0787084	0.116949	0.15519	0.193432	0.231673	0.269914	0.308155	0.346396	0.384637
2016	Anhui	42959.2	0.343609	32.9261	0.351146	1.69175	0.112713	0.136557	0.1604	0.184243	0.208087	0.23193	0.255773	0.279616	0.30346	0.327303
	Beijing	40269.6	0.321924	34.0478	0.36495	5.85629	0.399055	0.395644	0.392234	0.388823	0.385413	0.382002	0.378592	0.375181	0.371771	0.36836
	Fujian	48810.4	0.390786	20.5021	0.198256	1.84605	0.123323	0.130816	0.138309	0.145803	0.153296	0.160789	0.168283	0.175776	0.183269	0.190763
	Gansu	10243.3	0.07983	27.3921	0.283045	0.491204	0.0301678	0.0554555	0.0807432	0.106031	0.131319	0.156606	0.181894	0.207182	0.232469	0.257757
	Guangdong	124370	1	22.2274	0.219487	3.07086	0.207537	0.208732	0.209927	0.211122	0.212317	0.213512	0.214707	0.215902	0.217097	0.218292
	Guangxi	24740.9	0.19672	25.9063	0.264761	0.757481	0.0484762	0.0701046	0.0917331	0.113362	0.13499	0.156618	0.178247	0.199875	0.221504	0.243132
	Guizhou	19586.4	0.155161	24.1579	0.243244	0.675371	0.0428306	0.0628719	0.0829132	0.102955	0.122996	0.143037	0.163079	0.18312	0.203161	0.223203
	Hainan	6475.2	0.0494488	14.4629	0.123938	1.5059	0.0999353	0.102336	0.104736	0.107136	0.109536	0.111936	0.114337	0.116737	0.119137	0.121537
	Hebei	40391.3	0.322905	35.3334	0.380771	1.47329	0.0976931	0.126001	0.154309	0.182616	0.210924	0.239232	0.26754	0.295848	0.324155	0.352463
	Henan	58887.4	0.472034	38.436	0.418952	1.71104	0.11404	0.144531	0.175022	0.205514	0.236005	0.266496	0.296987	0.327478	0.357969	0.388461
	Heilongjiang	14879.2	0.117208	21.3996	0.2093	0.622681	0.0392078	0.056217	0.0732262	0.0902355	0.107245	0.124254	0.141263	0.158272	0.175282	0.192291
	Hubei	50012.9	0.400481	29.9826	0.314924	0.986916	0.0642514	0.0893187	0.114386	0.139453	0.16452	0.189588	0.214655	0.239722	0.264789	0.289856
	Hunan	46063.1	0.368635	28.6531	0.298562	0.76943	0.0492978	0.0742242	0.0991507	0.124077	0.149004	0.17393	0.198856	0.223783	0.248709	0.273636
	Jilin	13235.5	0.103955	25.1921	0.255972	0.867317	0.0560282	0.0760225	0.0960169	0.116011	0.136006	0.156	0.175994	0.195989	0.215983	0.235977
	Jiangsu	116364	0.935454	35.7285	0.385633	4.46651	0.303498	0.311711	0.319925	0.328138	0.336352	0.344565	0.352779	0.360992	0.369206	0.377419
	Jiangxi	29619.7	0.236057	23.9094	0.240187	0.89077	0.0576407	0.0758953	0.0941499	0.112404	0.130659	0.148914	0.167168	0.185423	0.203677	0.221932
	Liaoning	27584.1	0.219644	31.235	0.330335	1.39014	0.0919761	0.115812	0.139648	0.163484	0.18732	0.211156	0.234991	0.258827	0.282663	0.306499
	Inner Mongolia	20514.2	0.162641	23.6375	0.236841	0.45853	0.0279212	0.0488131	0.0697051	0.090597	0.111489	0.132381	0.153273	0.174165	0.195057	0.215949
	Ningxia	4522.3	0.0337031	29.197	0.305255	1.1288	0.0740071	0.0971319	0.120257	0.143382	0.166506	0.189631	0.212756	0.235881	0.259006	0.28213
	Qinghai	3346.6	0.0242237	10.0221	0.0692889	0.385857	0.0229244	0.0275609	0.0321973	0.0368338	0.0414702	0.0461067	0.0507431	0.0553795	0.060016	0.0646524
	Shandong	22590.2	0.17938	40.3265	0.442216	2.52498	0.170004	0.197225	0.224447	0.251668	0.278889	0.30611	0.333331	0.360552	0.387774	0.414995
	Shanxi	83095.9	0.667221	33.0149	0.352238	1.20244	0.0790705	0.106387	0.133704	0.161021	0.188338	0.215654	0.242971	0.270288	0.297605	0.324922
	Shaanxi	29801	0.237518	26.3222	0.269879	1.02245	0.0666946	0.0870131	0.107331	0.12765	0.147968	0.168287	0.188605	0.208923	0.229242	0.24956
	Shanghai	43214.9	0.345671	27.3625	0.282681	14.5964	1	0.928268	0.856536	0.784804	0.713072	0.64134	0.569608	0.497876	0.426144	0.354412
	Sichuan	53850.8	0.431425	18.0105	0.167594	0.629282	0.0396616	0.0524548	0.065248	0.0780412	0.0908344	0.103628	0.116421	0.129214	0.142007	0.1548
	Tianjin	15695	0.123786	43.0635	0.475897	7.55753	0.516027	0.512014	0.508001	0.503988	0.499975	0.495962	0.491949	0.487936	0.483923	0.47991
	Tibet	2080.2	0.0140131	5.40201	0.0124334	0.356043	0.0208745	0.0200304	0.0191863	0.0183422	0.0174981	0.016654	0.0158099	0.0149658	0.0141216	0.0132775
	Xinjiang	15983.6	0.126112	39.0292	0.426252	0.489051	0.0300198	0.0696429	0.109266	0.148889	0.188512	0.228136	0.267759	0.307382	0.347005	0.386628
	Yunnan	27146.8	0.216118	23.9522	0.240713	0.589511	0.0369271	0.0573056	0.0776842	0.0980628	0.118441	0.13882	0.159199	0.179577	0.199956	0.220334
	Zhejiang	73515.8	0.589979	22.2747	0.22007	3.52656	0.23887	0.23699	0.23511	0.23323	0.23135	0.22947	0.22759	0.22571	0.22383	0.22195
	Chongqing	27894	0.222143	27.6441	0.286145	1.17724	0.0773379	0.0982186	0.119099	0.13998	0.160861	0.181742	0.202622	0.223503	0.244384	0.265264
2021	Anhui	27018	0.21508	46.9115	0.523251	1.21786	0.0801305	0.124443	0.168755	0.213067	0.257379	0.301691	0.346003	0.390315	0.434627	0.478939
	Beijing	28014.9	0.223118	46.7368	0.521102	4.65857	0.316703	0.337143	0.357583	0.378023	0.398463	0.418902	0.439342	0.459782	0.480222	0.500662
	Fujian	32182.1	0.256716	26.0817	0.266919	1.348	0.0890782	0.106862	0.124646	0.142431	0.160215	0.177999	0.195783	0.213567	0.231351	0.249135
	Gansu	7459.9	0.0573882	30.217	0.317808	0.377706	0.022364	0.0519083	0.0814527	0.110997	0.140542	0.170086	0.19963	0.229175	0.258719	0.288263
	Guangdong	18523.3	0.146589	31.4036	0.33241	1.94349	0.130023	0.150261	0.1705	0.190739	0.210978	0.231216	0.251455	0.271694	0.291933	0.312171
	Guangxi	89705.2	0.72051	33.6786	0.360407	0.526143	0.03257	0.0653537	0.0981374	0.130921	0.163705	0.196488	0.229272	0.262056	0.294839	0.327623
	Guizhou	13540.8	0.106417	30.289	0.318694	0.629722	0.0396919	0.0675921	0.0954923	0.123392	0.151293	0.179193	0.207093	0.234993	0.262893	0.290794
	Hainan	4462.54	0.0332213	19.9402	0.191341	1.02527	0.0668885	0.0793338	0.0917791	0.104224	0.11667	0.129115	0.14156	0.154005	0.166451	0.178896
	Hebei	44552.8	0.356458	49.3437	0.553181	1.07642	0.0704052	0.118683	0.16696	0.215238	0.263516	0.311793	0.360071	0.408349	0.456626	0.504904
	Henan	34016.3	0.271505	53.7142	0.606966	1.18171	0.0776448	0.130577	0.183509	0.236441	0.289373	0.342305	0.395238	0.44817	0.501102	0.554034
	Heilongjiang	15902.7	0.12546	28.1529	0.292408	0.48395	0.029669	0.0559429	0.0822167	0.108491	0.134764	0.161038	0.187312	0.213586	0.23986	0.266134
	Hubei	35478.1	0.283291	39.907	0.437054	0.720866	0.0459586	0.0850682	0.124178	0.163287	0.202397	0.241506	0.280616	0.319725	0.358835	0.397945
	Hunan	33903	0.270591	37.9924	0.413492	0.603821	0.037911	0.0754691	0.113027	0.150585	0.188143	0.225702	0.26326	0.300818	0.338376	0.375934
	Jilin	14944.5	0.117735	34.445	0.369838	0.633379	0.0399433	0.0729327	0.105922	0.138912	0.171901	0.20489	0.23788	0.270869	0.303859	0.336848
	Jiangsu	20006.3	0.158546	47.5933	0.531642	3.50085	0.237102	0.266556	0.29601	0.325464	0.354918	0.384372	0.413826	0.44328	0.472734	0.502188
	Jiangxi	85869.8	0.689585	36.5867	0.396194	0.547971	0.0340709	0.0702832	0.106496	0.142708	0.17892	0.215132	0.251345	0.287557	0.323769	0.359982
	Liaoning	23409.2	0.185983	38.0542	0.414253	1.14336	0.0750077	0.108932	0.142857	0.176781	0.210706	0.244631	0.278555	0.31248	0.346404	0.380329
	Inner Mongolia	16096.2	0.12702	23.3788	0.233657	0.345522	0.0201511	0.0415017	0.0628522	0.0842028	0.105553	0.126904	0.148255	0.169605	0.190956	0.212306
	Ningxia	3443.56	0.0250055	35.3454	0.380918	0.948814	0.0616316	0.0935603	0.125489	0.157418	0.189346	0.221275	0.253204	0.285132	0.317061	0.34899
	Qinghai	2624.83	0.0184043	11.1759	0.0834871	0.306536	0.0174705	0.0240722	0.0306739	0.0372755	0.0438772	0.0504788	0.0570805	0.0636822	0.0702838	0.0768855
	Shandong	72634.1	0.58287	54.2126	0.613099	1.76748	0.117921	0.167439	0.216956	0.266474	0.315992	0.36551	0.415028	0.464545	0.514063	0.563581
	Shanxi	15528.4	0.122442	44.2991	0.491104	0.871928	0.0563452	0.099821	0.143297	0.186773	0.230249	0.273724	0.3172	0.360676	0.404152	0.447628
	Shaanxi	21898.8	0.173805	35.2346	0.379555	0.802417	0.0515659	0.0843647	0.117164	0.149962	0.182761	0.21556	0.248359	0.281158	0.313957	0.346756
	Shanghai	30633	0.244226	38.0465	0.414158	13.8624	0.949533	0.895996	0.842458	0.788921	0.735383	0.681846	0.628308	0.574771	0.521233	0.467696
	Sichuan	36980.2	0.295402	21.9628	0.216232	0.484954	0.0297381	0.0483874	0.0670368	0.0856861	0.104335	0.122985	0.141634	0.160283	0.178933	0.197582
	Tianjin	18549.2	0.146798	60.2304	0.687155	6.28331	0.428416	0.454289	0.480163	0.506037	0.531911	0.557785	0.583659	0.609533	0.635407	0.661281
	Tibet	1310.92	0.00781061	5.09816	0.00869431	0.278063	0.0155128	0.014831	0.0141491	0.0134673	0.0127854	0.0121036	0.0114217	0.0107399	0.010058	0.00937616
	Xinjiang	10882	0.0849793	40.8197	0.448285	0.384973	0.0228636	0.0654058	0.107948	0.15049	0.193032	0.235574	0.278117	0.320659	0.363201	0.405743
	Yunnan	16376.3	0.129279	24.3813	0.245993	0.448935	0.0272615	0.0491346	0.0710078	0.092881	0.114754	0.136627	0.1585	0.180374	0.202247	0.22412
	Zhejiang	51768.3	0.414634	33.3653	0.356551	2.54489	0.171373	0.189891	0.208409	0.226927	0.245445	0.263962	0.28248	0.300998	0.319516	0.338034
	Chongqing	19424.7	0.153857	34.7262	0.373298	0.873132	0.056428	0.088115	0.119802	0.151489	0.183176	0.214863	0.24655	0.278237	0.309924	0.341611
2017	Anhui	30006.8	0.239178	40.7342	0.447233	1.28823	0.084969	0.121195	0.157422	0.193648	0.229875	0.266101	0.302327	0.338554	0.37478	0.411007
	Beijing	30320	0.241703	42.7276	0.471764	4.54667	0.309009	0.325285	0.34156	0.357836	0.374111	0.390387	0.406662	0.422938	0.439213	0.455489
	Fujian	35804	0.285919	23.5328	0.235552	1.41568	0.0937319	0.107914	0.122096	0.136278	0.15046	0.164642	0.178824	0.193006	0.207188	0.22137
	Gansu	8246.07	0.0637268	31.5547	0.33427	0.375268	0.0221963	0.0534037	0.0846111	0.115819	0.147026	0.178233	0.209441	0.240648	0.271856	0.303063
	Guangdong	20352.5	0.161338	28.4717	0.296331	2.1801	0.146291	0.161295	0.176299	0.191303	0.206307	0.221311	0.236315	0.251319	0.266323	0.281327
	Guangxi	97277.8	0.781565	30.3136	0.318996	0.577874	0.0361269	0.0644139	0.0927008	0.120988	0.149275	0.177562	0.205849	0.234136	0.262422	0.290709
	Guizhou	14806.5	0.116621	27.0784	0.279184	0.599416	0.0376081	0.0617657	0.0859232	0.110081	0.134238	0.158396	0.182553	0.206711	0.230869	0.255026
	Hainan	4832.05	0.0362005	17.4309	0.160462	1.04751	0.0684178	0.0776222	0.0868266	0.096031	0.105235	0.11444	0.123644	0.132849	0.142053	0.151258
	Hebei	48055.9	0.384702	43.3714	0.479686	1.08703	0.0711349	0.11199	0.152845	0.1937	0.234556	0.275411	0.316266	0.357121	0.397976	0.438831
	Henan	36010.3	0.287582	49.5148	0.555288	1.25333	0.0825696	0.129841	0.177113	0.224385	0.271657	0.318929	0.3662	0.413472	0.460744	0.508016
	Heilongjiang	16361.6	0.12916	22.4861	0.222671	0.463187	0.0282414	0.0476843	0.0671272	0.0865702	0.106013	0.125456	0.144899	0.164342	0.183785	0.203228
	Hubei	39366.6	0.314643	36.0737	0.389881	0.749921	0.0479564	0.0821488	0.116341	0.150534	0.184726	0.218919	0.253111	0.287304	0.321496	0.355689
	Hunan	36425.8	0.290932	32.7636	0.349147	0.624883	0.0393591	0.0703379	0.101317	0.132295	0.163274	0.194253	0.225232	0.256211	0.287189	0.318168
	Jilin	15074.6	0.118784	26.9291	0.277347	0.598512	0.037546	0.061526	0.0855061	0.109486	0.133466	0.157446	0.181426	0.205406	0.229387	0.253367
	Jiangsu	21984.8	0.174498	45.7656	0.50915	3.67785	0.249272	0.27526	0.301247	0.327235	0.353223	0.379211	0.405199	0.431186	0.457174	0.483162
	Jiangxi	92595.4	0.743812	29.2008	0.305303	0.584606	0.0365898	0.0634611	0.0903324	0.117204	0.144075	0.170946	0.197818	0.224689	0.25156	0.278432
	Liaoning	25315.3	0.201352	33.0408	0.352557	1.16544	0.0765262	0.104129	0.131732	0.159336	0.186939	0.214542	0.242145	0.269748	0.297351	0.324954
	Inner Mongolia	17289.2	0.136639	24.0589	0.242026	0.329293	0.0190353	0.0413344	0.0636335	0.0859326	0.108232	0.130531	0.15283	0.175129	0.197428	0.219727
	Ningxia	3705.18	0.0271149	33.804	0.36195	0.939467	0.060989	0.0910851	0.121181	0.151277	0.181373	0.211469	0.241566	0.271662	0.301758	0.331854
	Qinghai	2865.23	0.0203426	12.1305	0.0952346	0.290212	0.0163481	0.0242368	0.0321254	0.0400141	0.0479027	0.0557914	0.06368	0.0715687	0.0794573	0.0873459
	Shandong	76469.7	0.613795	48.0622	0.537412	1.92305	0.128617	0.169497	0.210376	0.251256	0.292135	0.333015	0.373894	0.414773	0.455653	0.496532
	Shanxi	16818.1	0.132841	39.1489	0.427725	0.89036	0.0576126	0.0946238	0.131635	0.168646	0.205657	0.242669	0.27968	0.316691	0.353702	0.390713
	Shaanxi	24438.3	0.194281	32.1366	0.34143	0.83519	0.0538192	0.0825803	0.111341	0.140103	0.168864	0.197625	0.226386	0.255147	0.283908	0.312669
	Shanghai	32679.9	0.26073	35.4901	0.382699	13.9434	0.955102	0.897862	0.840621	0.783381	0.726141	0.6689	0.61166	0.55442	0.497179	0.439939
	Sichuan	40678.1	0.325218	20.0115	0.192218	0.520738	0.0321985	0.0482004	0.0642024	0.0802044	0.0962064	0.112208	0.12821	0.144212	0.160214	0.176216
	Tianjin	18809.6	0.148898	52.7472	0.595065	6.59317	0.449721	0.464255	0.47879	0.493324	0.507858	0.522393	0.536927	0.551462	0.565996	0.580531
	Tibet	1477.63	0.00915474	5.23676	0.0103998	0.270373	0.0149841	0.0145257	0.0140672	0.0136088	0.0131504	0.012692	0.0122335	0.0117751	0.0113167	0.0108582
	Xinjiang	12199.1	0.0955989	46.132	0.513659	0.360974	0.0212135	0.0704581	0.119703	0.168947	0.218192	0.267436	0.316681	0.365925	0.41517	0.464414
	Yunnan	17881.1	0.141412	23.1162	0.230425	0.466983	0.0285024	0.0486947	0.0688869	0.0890792	0.109271	0.129464	0.149656	0.169848	0.19004	0.210233
	Zhejiang	56197.2	0.450343	28.8093	0.300484	2.69519	0.181707	0.193585	0.205463	0.21734	0.229218	0.241096	0.252973	0.264851	0.276729	0.288607
	Chongqing	20363.2	0.161424	31.496	0.333548	0.900377	0.0583013	0.0858259	0.113351	0.140875	0.1684	0.195924	0.223449	0.250974	0.278498	0.306023
2018	Anhui	37114	0.296481	42.119	0.464275	1.36173	0.0900228	0.127448	0.164873	0.202298	0.239724	0.277149	0.314574	0.351999	0.389424	0.42685
	Beijing	35371.3	0.28243	38.8886	0.424521	5.42117	0.369137	0.374676	0.380214	0.385753	0.391291	0.396829	0.402368	0.407906	0.413444	0.418983
	Fujian	42395	0.33906	22.6872	0.225146	1.48389	0.098422	0.111094	0.123767	0.136439	0.149112	0.161784	0.174457	0.187129	0.199802	0.212474
	Gansu	8718.3	0.0675343	27.1221	0.279722	0.390184	0.0232219	0.048872	0.074522	0.100172	0.125822	0.151472	0.177122	0.202772	0.228422	0.254072
	Guangdong	21237.1	0.16847	27.0853	0.279269	2.27844	0.153053	0.165675	0.178296	0.190918	0.203539	0.216161	0.228782	0.241404	0.254025	0.266647
	Guangxi	107671	0.865363	28.6826	0.298926	0.580379	0.0362992	0.0625618	0.0888245	0.115087	0.14135	0.167612	0.193875	0.220138	0.2464	0.272663
	Guizhou	16769.3	0.132448	25.6996	0.262217	0.682166	0.0432977	0.0651896	0.0870815	0.108973	0.130865	0.152757	0.174649	0.196541	0.218433	0.240325
	Hainan	5308.93	0.0400455	16.0774	0.143805	1.05358	0.0688351	0.0763321	0.0838292	0.0913262	0.0988232	0.10632	0.113817	0.121314	0.128811	0.136308
	Hebei	54259.2	0.434718	42.0958	0.463989	1.21587	0.0799937	0.118393	0.156793	0.195192	0.233592	0.271991	0.310391	0.348791	0.38719	0.42559
	Henan	35104.5	0.280279	50.3829	0.56597	1.39768	0.0924943	0.139842	0.187189	0.234537	0.281885	0.329232	0.37658	0.423927	0.471275	0.518623
	Heilongjiang	13612.7	0.106996	23.225	0.231764	0.48626	0.0298278	0.0500215	0.0702151	0.0904087	0.110602	0.130796	0.15099	0.171183	0.191377	0.211571
	Hubei	45828.3	0.366742	38.3465	0.417849	0.808838	0.0520074	0.0885916	0.125176	0.16176	0.198344	0.234928	0.271513	0.308097	0.344681	0.381265
	Hunan	39752.1	0.317752	34.7747	0.373895	0.656399	0.0415261	0.074763	0.108	0.141237	0.174474	0.207711	0.240948	0.274185	0.307422	0.340658
	Jilin	11726.8	0.0917912	28.9244	0.301901	0.68474	0.0434747	0.0693173	0.0951599	0.121003	0.146845	0.172688	0.19853	0.224373	0.250215	0.276058
	Jiangsu	24757.5	0.196854	44.5446	0.494124	3.85382	0.261371	0.284646	0.307921	0.331197	0.354472	0.377747	0.401023	0.424298	0.447573	0.470848
	Jiangxi	99631.5	0.800543	29.9621	0.314671	0.60873	0.0382485	0.0658907	0.0935329	0.121175	0.148817	0.17646	0.204102	0.231744	0.259386	0.287028
	Liaoning	24909.5	0.198079	33.5254	0.358521	1.24326	0.081877	0.109541	0.137206	0.16487	0.192535	0.220199	0.247864	0.275528	0.303192	0.330857
	Inner Mongolia	17212.5	0.136021	22.3525	0.221027	0.353436	0.0206953	0.0407285	0.0607617	0.0807949	0.100828	0.120861	0.140895	0.160928	0.180961	0.200994
	Ningxia	3748.48	0.027464	29.3855	0.307575	0.941987	0.0611623	0.0858035	0.110445	0.135086	0.159727	0.184369	0.20901	0.233651	0.258293	0.282934
	Qinghai	2965.95	0.0211547	10.0543	0.0696848	0.296867	0.0168057	0.0220936	0.0273815	0.0326694	0.0379573	0.0432452	0.0485331	0.053821	0.0591089	0.0643969
	Shandong	71067.5	0.570239	50.6201	0.56889	2.08226	0.139564	0.182496	0.225429	0.268362	0.311294	0.354227	0.397159	0.440092	0.483024	0.525957
	Shanxi	17026.7	0.134522	38.3019	0.417301	0.985394	0.0641468	0.0994622	0.134778	0.170093	0.205408	0.240724	0.276039	0.311355	0.34667	0.381985
	Shaanxi	25793.2	0.205204	31.5942	0.334756	0.858739	0.0554384	0.0833701	0.111302	0.139234	0.167165	0.195097	0.223029	0.250961	0.278892	0.306824
	Shanghai	38155.3	0.304877	33.7631	0.361447	14.5497	0.996786	0.933252	0.869718	0.806184	0.74265	0.679116	0.615582	0.552049	0.488515	0.424981
	Sichuan	46615.8	0.373092	19.0995	0.180995	0.5544	0.034513	0.0491612	0.0638094	0.0784577	0.0931059	0.107754	0.122402	0.137051	0.151699	0.166347
	Tianjin	14104.3	0.11096	51.0164	0.573767	6.9555	0.474634	0.484547	0.49446	0.504374	0.514287	0.5242	0.534113	0.544027	0.55394	0.563853
	Tibet	1697.82	0.0109301	4.65446	0.0032341	0.24795	0.0134424	0.0124215	0.0114007	0.0103799	0.00935905	0.00833823	0.0073174	0.00629658	0.00527575	0.00425493
	Xinjiang	13597.1	0.106871	41.0946	0.451668	0.386761	0.0229866	0.0658548	0.108723	0.151591	0.194459	0.237328	0.280196	0.323064	0.365932	0.4088
	Yunnan	23223.8	0.184488	23.0309	0.229376	0.443795	0.026908	0.0471548	0.0674016	0.0876484	0.107895	0.128142	0.148389	0.168636	0.188882	0.209129
	Zhejiang	62351.7	0.499966	28.1061	0.291831	2.8113	0.189691	0.199905	0.210119	0.220333	0.230547	0.240761	0.250975	0.261189	0.271403	0.281617
	Chongqing	23605.8	0.187568	32.3391	0.343922	0.963324	0.0626293	0.0907586	0.118888	0.147017	0.175146	0.203276	0.231405	0.259534	0.287664	0.315793
2019	Anhui	38680.6	0.309112	35.0309	0.377048	1.46617	0.0972036	0.125188	0.153172	0.181157	0.209141	0.237126	0.26511	0.293094	0.321079	0.349063
	Beijing	36102.6	0.288326	32.4924	0.345809	5.61358	0.382367	0.378711	0.375055	0.371399	0.367744	0.364088	0.360432	0.356777	0.353121	0.349465
	Fujian	43903.9	0.351226	19.352	0.184103	1.59504	0.106064	0.113868	0.121672	0.129476	0.137279	0.145083	0.152887	0.160691	0.168495	0.176299
	Gansu	9016.7	0.0699402	27.2509	0.281307	0.428408	0.0258501	0.0513958	0.0769415	0.102487	0.128033	0.153579	0.179124	0.20467	0.230216	0.255761
	Guangdong	22156.7	0.175884	21.4546	0.209977	2.58912	0.174414	0.177971	0.181527	0.185083	0.18864	0.192196	0.195752	0.199308	0.202865	0.206421
	Guangxi	110761	0.890276	24.6292	0.249044	0.68705	0.0436336	0.0641746	0.0847157	0.105257	0.125798	0.146339	0.16688	0.187421	0.207962	0.228503
	Guizhou	17826.6	0.140972	22.2237	0.219442	0.639386	0.0403563	0.0582649	0.0761734	0.094082	0.111991	0.129899	0.147808	0.165716	0.183625	0.201533
	Hainan	5532.39	0.0418472	13.6982	0.114526	1.16229	0.0763099	0.0801315	0.0839532	0.0877748	0.0915965	0.0954181	0.0992398	0.103061	0.106883	0.110705
	Hebei	54997.1	0.440667	36.4015	0.393915	1.34352	0.0887704	0.119285	0.149799	0.180314	0.210828	0.241343	0.271857	0.302372	0.332886	0.3634
	Henan	36206.9	0.289167	43.2121	0.477726	1.51479	0.100546	0.138264	0.175982	0.2137	0.251418	0.289136	0.326854	0.364572	0.40229	0.440008
	Heilongjiang	13698.5	0.107688	21.5754	0.211464	0.553934	0.0344809	0.0521792	0.0698776	0.0875759	0.105274	0.122973	0.140671	0.158369	0.176067	0.193766
	Hubei	43443.5	0.347514	30.6309	0.322902	0.855681	0.0552281	0.0819955	0.108763	0.13553	0.162298	0.189065	0.215832	0.2426	0.269367	0.296135
	Hunan	41781.5	0.334114	28.6065	0.297988	0.668106	0.042331	0.0678968	0.0934625	0.119028	0.144594	0.17016	0.195725	0.221291	0.246857	0.272423
	Jilin	12311.3	0.0965038	28.115	0.29194	0.766652	0.0491067	0.0733901	0.0976734	0.121957	0.14624	0.170523	0.194807	0.21909	0.243374	0.267657
	Jiangsu	25691.5	0.204385	38.1245	0.415118	4.12599	0.280084	0.293588	0.307091	0.320594	0.334098	0.347601	0.361104	0.374608	0.388111	0.401614
	Jiangxi	102719	0.825436	24.4491	0.246828	0.691007	0.0439056	0.0641979	0.0844902	0.104782	0.125075	0.145367	0.165659	0.185951	0.206244	0.226536
	Liaoning	25115	0.199736	33.2951	0.355688	1.29097	0.0851572	0.11221	0.139263	0.166316	0.193369	0.220422	0.247475	0.274528	0.301581	0.328635
	Inner Mongolia	17359.8	0.137209	21.0503	0.205002	0.414043	0.0248624	0.0428764	0.0608904	0.0789044	0.0969184	0.114932	0.132946	0.15096	0.168974	0.186988
	Ningxia	3920.55	0.0288513	28.2434	0.29352	1.03651	0.0676612	0.0902471	0.112833	0.135419	0.158005	0.180591	0.203177	0.225763	0.248349	0.270934
	Qinghai	3005.92	0.0214769	9.8039	0.0666034	0.3236	0.0186438	0.0234398	0.0282357	0.0330317	0.0378276	0.0426236	0.0474196	0.0522155	0.0570115	0.0618074
	Shandong	73129	0.58686	44.5177	0.493793	2.26778	0.15232	0.186467	0.220614	0.254762	0.288909	0.323057	0.357204	0.391351	0.425499	0.459646
	Shanxi	17651.9	0.139564	34.1328	0.365995	1.07637	0.0704021	0.0999614	0.129521	0.15908	0.188639	0.218199	0.247758	0.277317	0.306877	0.336436
	Shaanxi	26181.9	0.208338	28.0133	0.29069	0.906237	0.0587042	0.0819027	0.105101	0.1283	0.151498	0.174697	0.197895	0.221094	0.244293	0.267491
	Shanghai	38700.6	0.309273	29.2328	0.305696	14.269	0.977487	0.910308	0.843129	0.775949	0.70877	0.641591	0.574412	0.507233	0.440054	0.372875
	Sichuan	48598.8	0.38908	17.2804	0.15861	0.592372	0.0371238	0.0492724	0.061421	0.0735696	0.0857182	0.0978667	0.110015	0.122164	0.134312	0.146461
	Tianjin	14083.7	0.110794	47.9756	0.536347	7.05561	0.481516	0.486999	0.492482	0.497965	0.503448	0.508932	0.514415	0.519898	0.525381	0.530864
	Tibet	1902.74	0.0125823	4.39166	0	0.302815	0.0172147	0.0154932	0.0137718	0.0120503	0.0103288	0.00860735	0.00688588	0.00516441	0.00344294	0.00172147
	Xinjiang	13797.6	0.108487	42.2451	0.465826	0.461782	0.0281448	0.0719129	0.115681	0.159449	0.203217	0.246985	0.290753	0.334522	0.37829	0.422058
	Yunnan	24521.9	0.194954	21.8107	0.214359	0.519018	0.0320802	0.0503081	0.068536	0.0867639	0.104992	0.12322	0.141448	0.159675	0.177903	0.196131
	Zhejiang	64613.3	0.518201	23.0133	0.229158	2.96289	0.200113	0.203018	0.205922	0.208827	0.211731	0.214636	0.21754	0.220445	0.223349	0.226254
	Chongqing	25002.8	0.198832	27.1042	0.279502	1.02228	0.0666827	0.0879646	0.109247	0.130528	0.15181	0.173092	0.194374	0.215656	0.236938	0.25822
